# Supplementary material
Source: MDPI journal article supplement (https://www.mdpi.com/1999-4907/14/9/1917)
Supplement: s1 [file s1 › forests-2612586-supplementary caption new.pdf]

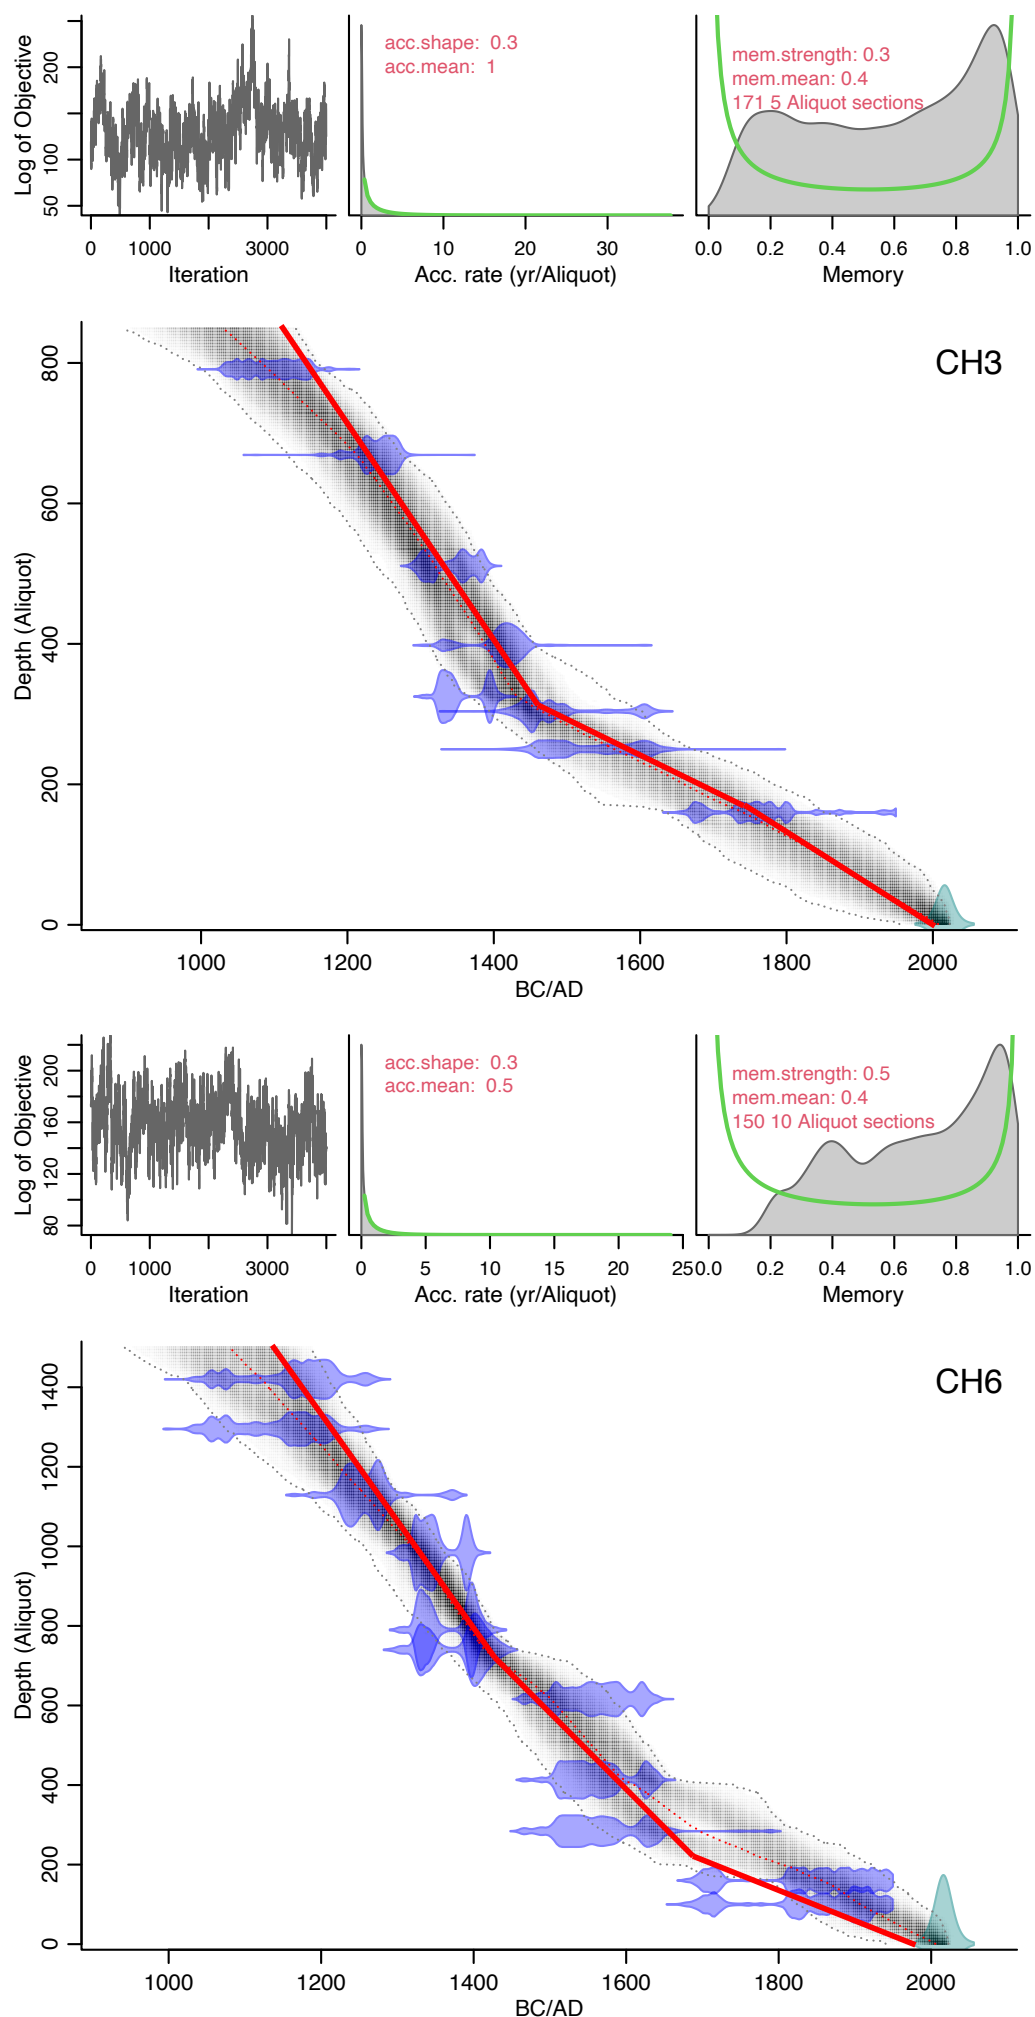

**Figure S1. Age-depth model.** The Bayesian accumulation (BACON) model is presented for samples CH3 and CH6. This model used the 19 radiocarbon dates (blue) calibrated using SHCal20 [78], which were presented in Table 1. Our linear age model for both samples can be seen in thick red lines, on top of the BACON model, for comparison.
